# Supplementary material
Source: PubMed Central journal article supplement (PMC4934452)
Supplement: supp_JCO.2012.41.6677_Web_appendix.pdf [file supp_JCO.2012.41.6677_Web_appendix.pdf]

## Web-appendix 1: searching strategy

| Base                                                                                                           | Search strategy                                                                                                                                                                                                                                                                                                                                                                 | Limites   | References                                                                                      | Date        |
|----------------------------------------------------------------------------------------------------------------|---------------------------------------------------------------------------------------------------------------------------------------------------------------------------------------------------------------------------------------------------------------------------------------------------------------------------------------------------------------------------------|-----------|-------------------------------------------------------------------------------------------------|-------------|
| PubMed MEDLINE                                                                                                 | ((("Lung Neoplasms/radiotherapy"[MeSH] AND Randomized Controlled Trial[ptyp]) OR ("Lung Neoplasms/radiotherapy"[MAJR] AND "Randomized Controlled Trials"[MeSH Terms]) OR ("Lung Neoplasms"[MAJR] AND (radiother*[Title] OR radiat*[Title]) AND random*[Title] OR (lung[Title] AND (radiother*[Title] OR radiat*[Title]) AND random*[Title])) AND ("1980"[PDAT] : "3000"[PDAT])) | 2007-1980 | 575<br>Fichier joint<br>pubmed-<br>resultcancer<br>poumon<br>radither<br>random 11 01<br>07.txt | 11-janv.-07 |
| EMBASE via<br>Datastar Dialog                                                                                  | (LUNG-CANCER-RT.MJ. OR LUNG.TI. AND<br>CANCER.TI. AND radiother\$.TI.) AND<br>(random\$.TI. OR RANDOMIZED-<br>CONTROLLED-TRIAL.DE.) AND CLINICAL-<br>TRIAL#                                                                                                                                                                                                                     | 2007-1980 | 125<br>Fichier joint                                                                            | 11-janv.-07 |
| Cochrane Central<br>Register of<br>Controlled Trials                                                           | There are 5 results out of 479462 records for:<br>"lung cancer radiotherapy and randomized in<br>Publication Type not PubMed, from 1980 to<br>2007 in The Cochrane Central Register of<br>Controlled Trials"                                                                                                                                                                    | 2007-1980 | 1<br>Fichier joint                                                                              | 11-janv.-07 |
| ASTRO Annual<br>Meeting                                                                                        | <a href="http://www.redjournal.org/content/astro_abstracts">http://www.redjournal.org/content/astro_abstracts</a>                                                                                                                                                                                                                                                               | 2006-2005 | 8                                                                                               | 12-Jan-07   |
| ASCO's<br>comprehensive<br>database of<br>abstracts<br><a href="http://www.asco.org/">http://www.asco.org/</a> | search for lung in Title and randomized in Title<br>and radiotherapy in Title within selected<br>meetings returned 14 items.                                                                                                                                                                                                                                                    | 2006-1995 | 14                                                                                              | 12-Jan-07   |

- Web-appendix 2: excluded trials
- *Absence of arm with conventional radiotherapy*
  - Cox JD, Azarnia N, Byhardt RW, Shin KH, Emami B, Pajak TF. A Randomized Phase I/II Trial of Hyperfractionated Radiation Therapy With Total Doses of 60.0 Gy to 79.2 Gy: Possible Survival Benefit With 69.6 Gy in Favorable Patients With Radiation Therapy Oncology Group Stage III Non-Small-Cell Lung Carcinoma: Report of Radiation Therapy Oncology Group 83-11. *J Clin Oncol* 1990; 8:1543-1555.
  - Kagami Y, Nishio M, Narimatsu N, Ogawa H, Sakurai T. Prospective randomized trials comparing hyperfractionated radiotherapy with conventional radiotherapy in stage III non-small cell lung cancer. *Nippon Igaku Hoshasen Gakkai Zasshi* 1992; 52:1452-1455.
  - Coy P, Hodson I, Payne DG, Evans WK, Feld R, MacDonald AS, Osoba D, Pater JL. The effect of dose of thoracic irradiation on recurrence in patients with limited stage small cell lung cancer. Initial results of a Canadian Multicenter Randomized Trial. *Int J Radiat Oncol Biol Phys* 1988; 14:219-226.
- *Counfounded by different chemotherapy in the two arms*
  - Nalca Andrieu M, Eraslan A, Hicsonmez A, Guney Y. Concomitant boost technique versus conventional radiotherapy in locally advanced non-small cell lung cancer. *Radiother Oncol* 2006; 81(Suppl 1):S385. [Poster]
  - Wang G, Song M, Xu H, Fang Y. prospective trial of combined hyperfractionated radiotherapy and bronchial arterial infusion of chemotherapy for locally advanced non-small cell lung cancer. *Int J Radiat Oncol Biol Phys* 1996;34:309-313.
- *Trials comparing different doses and durations of conventional or hypofractionated (3 or 4 Gy) radiotherapy*
  - Perez CA, Stanley K, Rubin P et al. A prospective randomized study of various irradiation doses and fractionation schedules in the treatment of inoperable non-oat cell carcinoma of the lung: Preliminary report by the Radiation Therapy Oncology Group. *Cancer* 1980 45: 2744-2753,
  - Perez CA, Stanley K, Grundy G et al. Impact of irradiation technique and tumor extent in tumor control and survival of patients with unresectable non-oat cell carcinoma of the lung: Report by the Radiation Therapy Oncology Group. *Cancer* 1982; 50: 1091-1099.
  - Perez CA, Pajak TF, Rubin P, Simpson JR, Mohiuddin M, Brady LW, Perez-Tamayo R, Rotman M. Long-Term Observations of the Patterns of Failure in Patients With Unresectable Non-Oat Cell Carcinoma of the Lung Treated With Definitive Radiotherapy. Report by the Radiation Therapy Oncology Group. *Cancer* 1987 ;59 :1874-1881.
- *Randomized phase I*
  - Tsuchiya S, Ohe Y, Sugiura T, Fuwa N, Kitamoto Y, Mori K, Kobayashi H, Nakata K, Sawa T, Hirai K, Etoh T, Saka H, Saito A, Fukuda H, Ishizuka N, Saijo N. Randomized phase I study of standard-fractionated or accelerated-hyperfractionated radiotherapy with concurrent cisplatin and vindesine for unresectable non-small cell lung cancer: A report of Japan Clinical Oncology Group Study (JCOG 9601). *Jpn J Clin Oncol* 2001; 31:488-494.

Web-appendix 3: definition of radiotherapy group

|              |        | LOWER                            | IDENTICAL (+/- 5%)                                  | HIGHER                         |                                 |                                |                                 |
|--------------|--------|----------------------------------|-----------------------------------------------------|--------------------------------|---------------------------------|--------------------------------|---------------------------------|
| ACCELERATION | 0-13%  |                                  | Schild 1990<br>SCLC<br><br>NCCTG 90<br><br>NCCTG 94 | RTOG 88-08                     |                                 |                                |                                 |
|              | 14-49% |                                  | ECOG 3588<br>SCLC                                   | Gliwice<br>2001                |                                 |                                |                                 |
|              | ≥ 50%  | CHART<br>CHARTWEL<br>CHARTWEL CT | ECOG 2597                                           | PMCI<br>PMCI CT                |                                 |                                |                                 |
|              |        | Hyperfractionated<br>< 1.25 Gy   | Normal<br>1.25-1.75 Gy 1.8-2 Gy                     | Hyperfractionated<br>< 1.25 Gy | Normal<br>1.25-1.75 Gy 1.8-2 Gy | Hyperfractionated<br>< 1.25 Gy | Normal<br>1.25-1.75 Gy 1.8-2 Gy |

- In black: small cell lung cancer trials (n=2)
- In blue: very accelerated RT trials (n=6)
- In purple: moderately accelerated RT (n=1)
- In red: hyperfractionated RT - identical total dose (n=2)
- In orange: hyperfractionated RT - increased total dose (n=1)

| Characteristics             | NSCLC trials<br>n=2000       |                           | SCLC trials<br>n=685         |                          |
|-----------------------------|------------------------------|---------------------------|------------------------------|--------------------------|
|                             | Conventional RT<br>n=944 (%) | Modified RT<br>n=1056 (%) | Conventional RT<br>n=342 (%) | Modified RT<br>n=343 (%) |
| <b>Sex</b>                  |                              |                           |                              |                          |
| Male                        | 698 (74)                     | 804 (76)                  | 201 (59)                     | 198 (58)                 |
| Female                      | 244 (26)                     | 250 (24)                  | 141 (41)                     | 145 (42)                 |
| Unknown                     | 2 (<1)                       | 2 (<1)                    |                              |                          |
| <b>Age</b>                  |                              |                           |                              |                          |
| ≤ 59                        | 275 (29)                     | 295 (28)                  | 118 (35)                     | 135 (39)                 |
| 60 -69                      | 407 (43)                     | 441 (42)                  | 165 (48)                     | 148 (43)                 |
| ≥ 70                        | 260 (28)                     | 318 (30)                  | 59 (17)                      | 60 (18)                  |
| Unknown                     | 2 (<1)                       | 2 (<1)                    |                              |                          |
| <b>Performance status</b>   |                              |                           |                              |                          |
| PS=0                        | 401 (43)                     | 447 (42)                  | 163 (48)                     | 136 (40)                 |
| PS=1                        | 538 (57)                     | 601 (57)                  | 159 (46)                     | 187 (54)                 |
| PS=2                        | 2 (<1)                       | 5 (1)                     | 19 (6)                       | 20 (6)                   |
| Unknown                     | 3 (<1)                       | 3 (<1)                    | 1 (<1)                       |                          |
| <b>Histology</b>            |                              |                           |                              |                          |
| Adenocarcinoma              | 125 (13)                     | 140 (13)                  | small-cell                   | small-cell               |
| Squamous                    | 563 (60)                     | 639 (61)                  | 100%                         | 100%                     |
| Large cell                  | 49 (5)                       | 61 (6)                    |                              |                          |
| Other                       | 60 (6)                       | 60 (6)                    |                              |                          |
| Non squamous<br>unspecified | 107 (11)                     | 116 (11)                  |                              |                          |
| NSCLC<br>unspecified        | 37 (4)                       | 37 (3)                    |                              |                          |
| Unknown                     | 3 (<1)                       | 3 (<1)                    |                              |                          |
| <b>Stage</b>                |                              |                           |                              |                          |
| I/II                        | 150 (16)                     | 178 (17)                  | limited stage                | limited stage            |
| III unspecified             | 3 (<1)                       | 3 (<1)                    | 100%                         | 100%                     |
| IIIA                        | 393 (42)                     | 464 (44)                  |                              |                          |
| IIIB                        | 384 (41)                     | 396 (37)                  |                              |                          |
| IV                          | 2 (<1)                       | 3 (<1)                    |                              |                          |
| Unknown                     | 12 (1)                       | 12 (1)                    |                              |                          |

**Web-Table 1: Description of randomized patients**

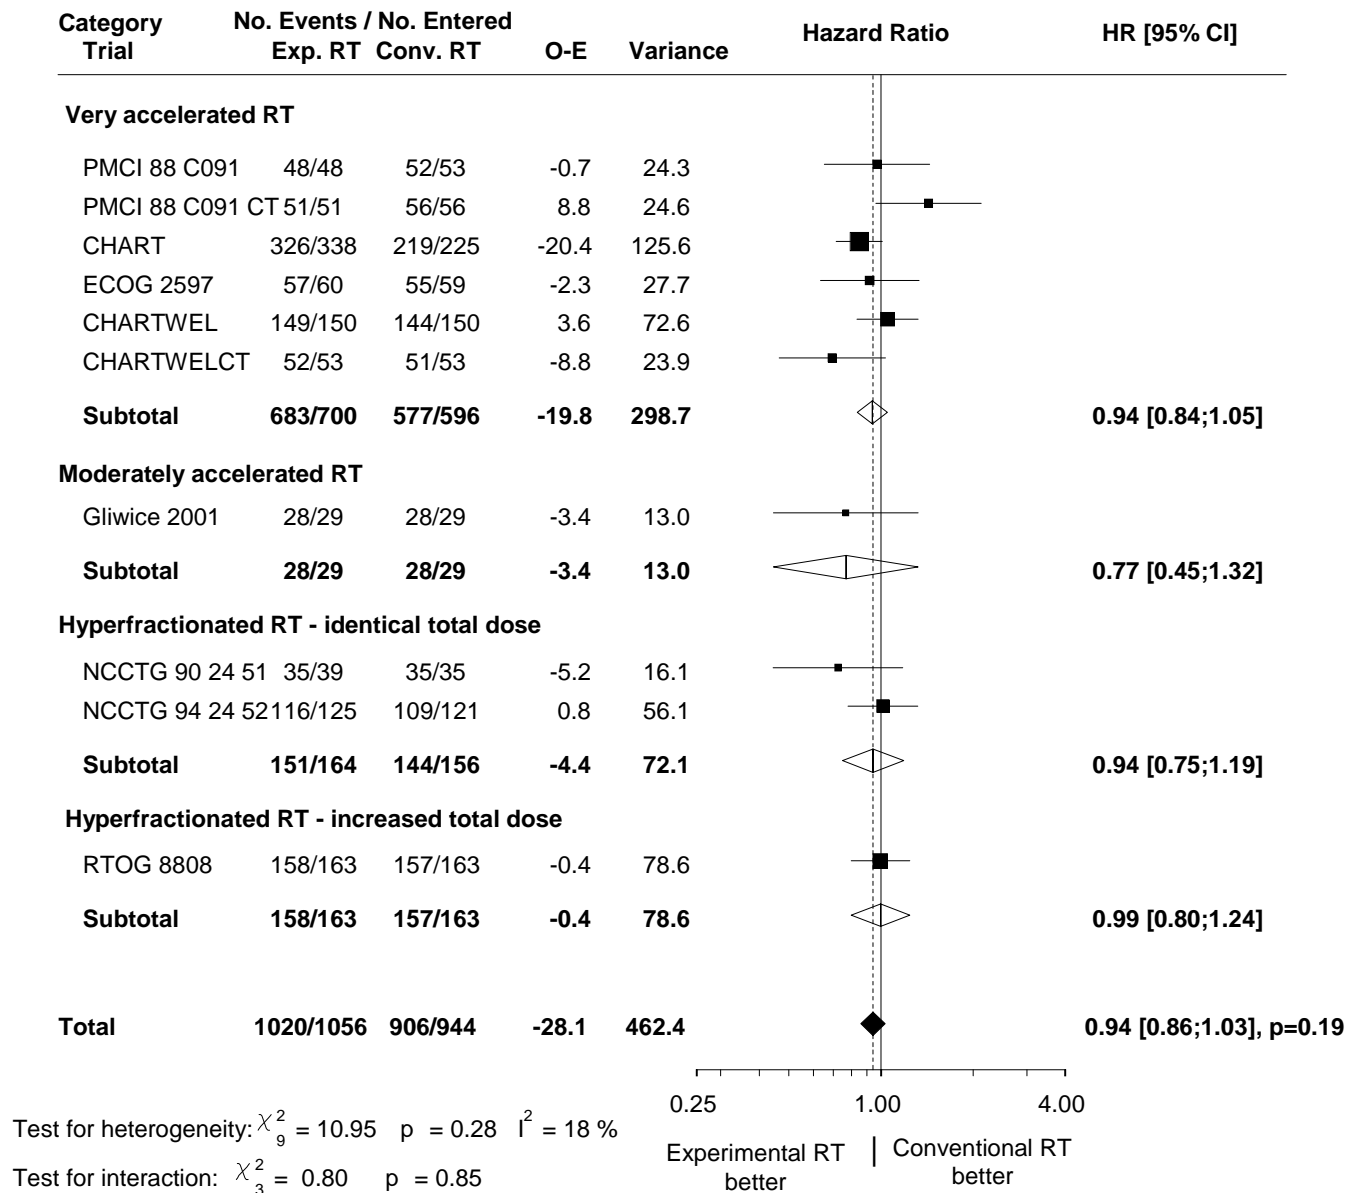

**Web-Figure 1: Effect of modified radiotherapy versus conventional radiotherapy on progression-free survival, by radiotherapy types in non-small cell lung cancer trials**  
 Each trial is represented by a square, the center of which denotes the hazard ratio for that trial comparison with the horizontal lines showing the 95% confidence intervals (CIs). The size of the square is directly proportional to the amount of information contributed by the trial. The clear diamonds represent pooled hazard ratios for the trial groups and the black diamond the overall hazard ratios, with the center denoting the hazard ratio and the extremities the 95% CI. The fixed effect model was used.  
**Conv.:** Conventional; **Exp.:** Experimental; **HR:** Hazard ratio; **RT:** Radiotherapy

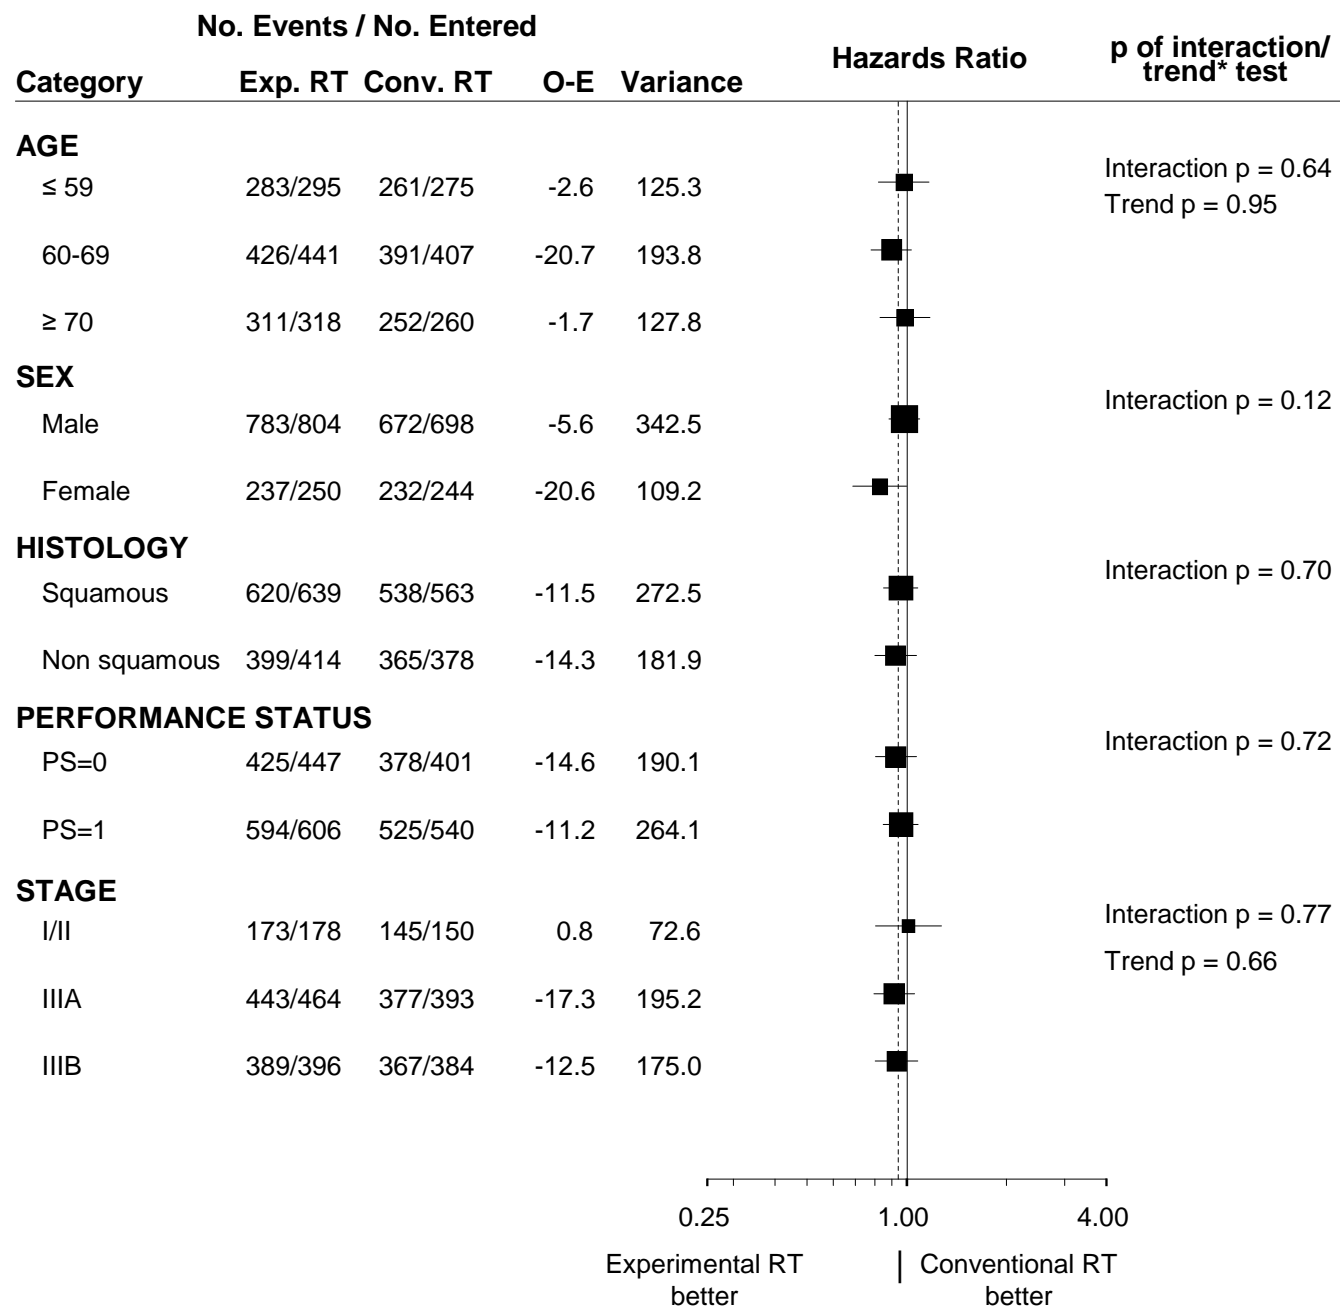

**Web-Figure 2: Effect of modified radiotherapy versus conventional radiotherapy on progression-free survival, by patients characteristics in non-small cell lung cancer trials.** See web-Figure 1 for legend details.

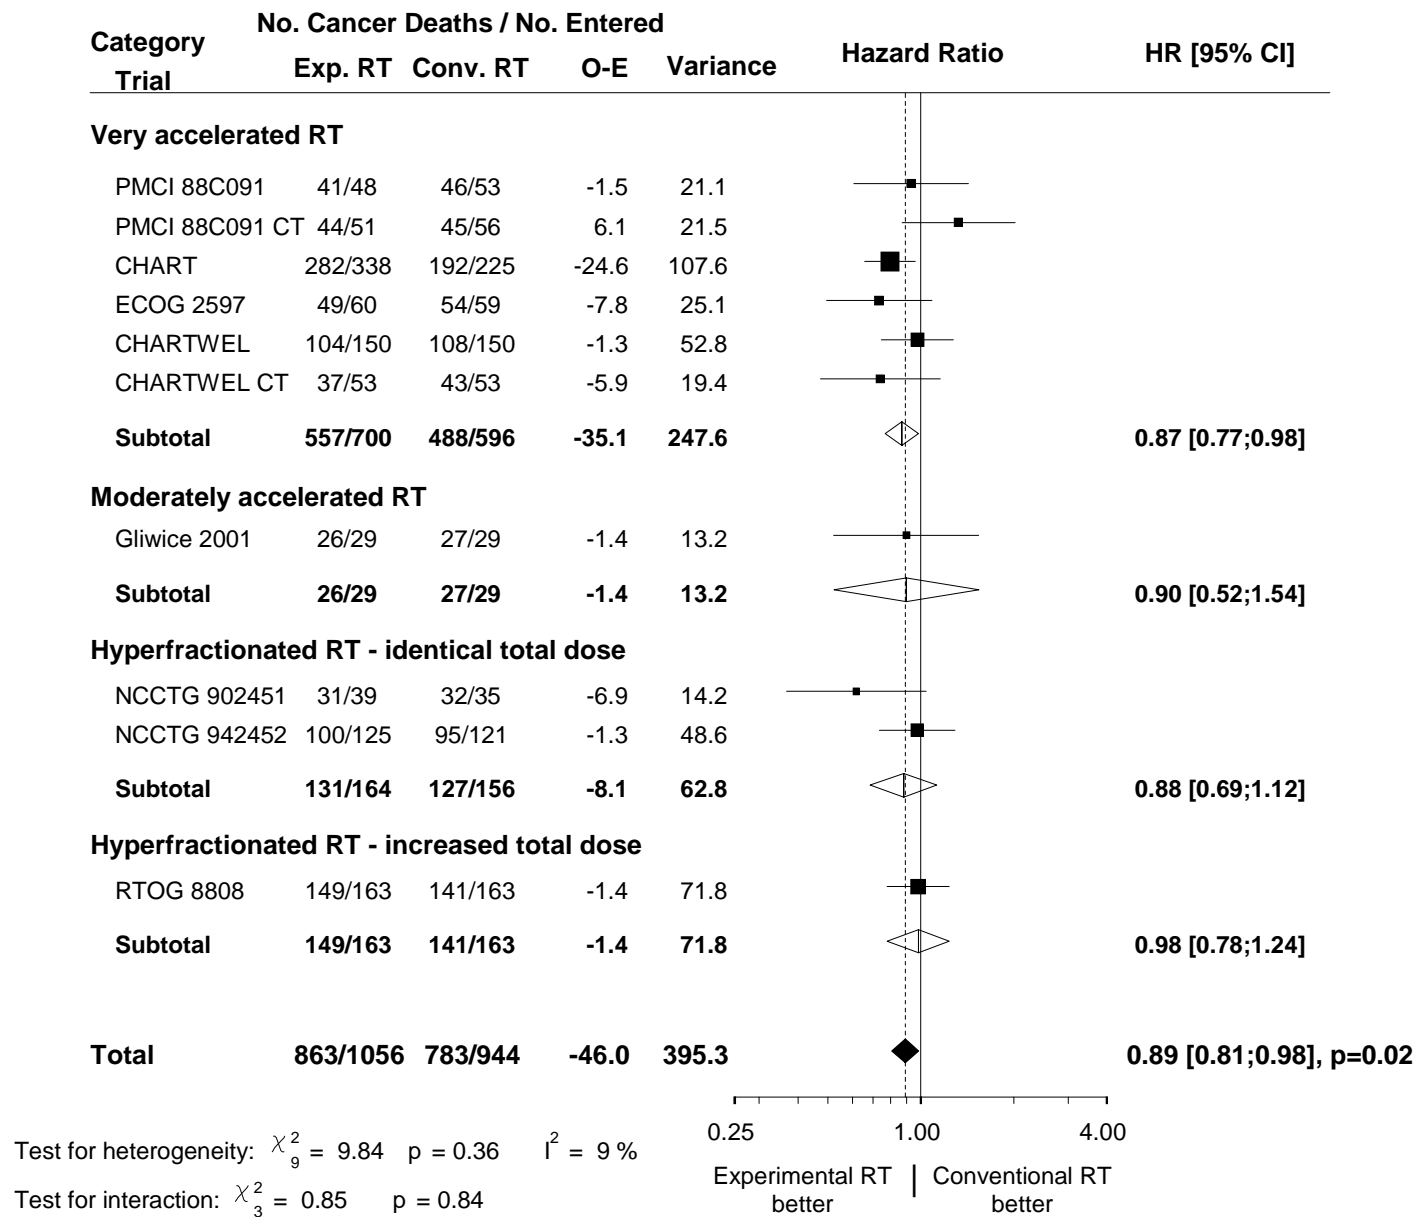

**Web-Figure 3: Effect of modified radiotherapy versus conventional radiotherapy on cancer deaths, by radiotherapy types in non-small cell lung cancer trials.** See web-Figure 1 for legend details.

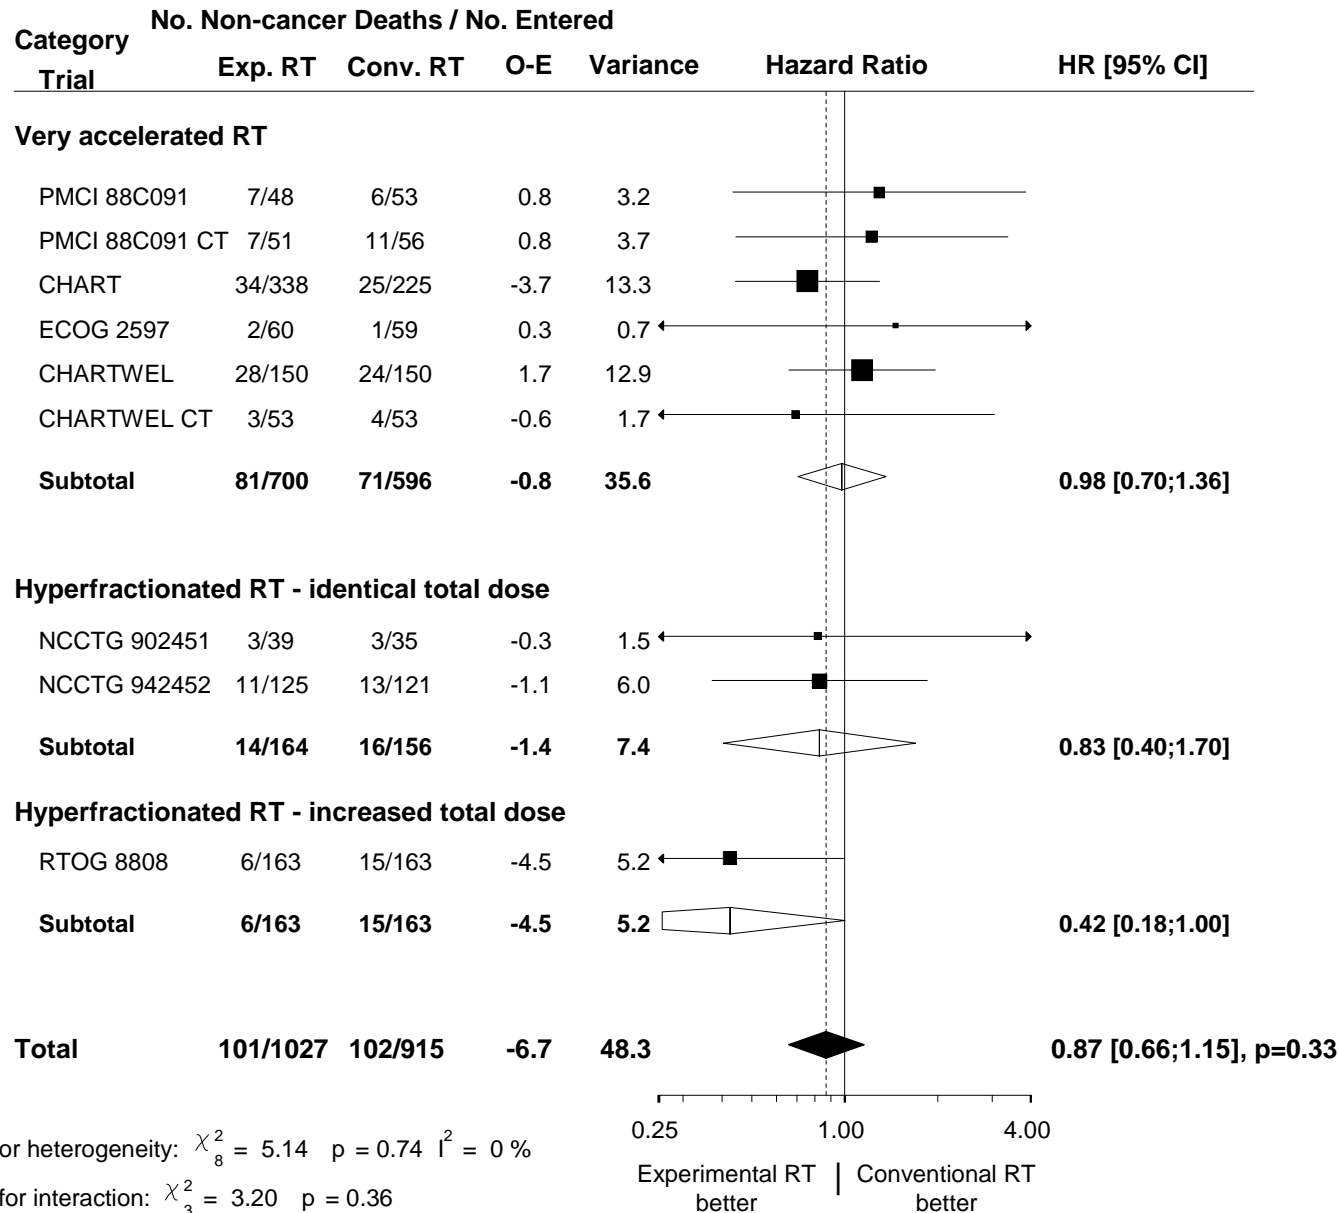

**Web-Figure 4: Effect of modified radiotherapy versus conventional radiotherapy on non-cancer deaths, by radiotherapy types in non-small cell lung cancer trials.** See web-Figure 1 for legend details.



| Trial                           | Total dose (Gy)*                     |                                          | Total no of fractions*           |                                    | Total duration (days)**          |                                  |
|---------------------------------|--------------------------------------|------------------------------------------|----------------------------------|------------------------------------|----------------------------------|----------------------------------|
|                                 | Conventional RT                      | Modified RT                              | Conventional RT                  | Modified RT                        | Conventional RT                  | Modified RT                      |
| <b>RTOG 8808/<br/>ECOG 4588</b> | 60 Gy / 90%<br>60.0 [0-69.6]         | 69.6 Gy / 85%<br>69.6 [0-73.9]           | 30 fr / 89%<br>30 [0-58]         | 58 fr / 84%<br>58 [0-59]           | 40 d / 59%<br>44 [9-66]          | 39 d / 64%<br>42 [4-67]          |
| <b>PMCI<br/>88C091</b>          | 60 Gy / 92%<br>60.0 [0-60]           | 60 Gy / 100%<br>60.0 [60-60]<br>2 MD     | 30 fr / 92%<br>30 [0-30]         | 30 fr / 100%<br>30 [30-30]<br>2 MD | 40 d / 87%<br>42 [5-48]<br>1 MD  | 19 d / 83%<br>19 [18-24]<br>2 MD |
| <b>PMCI<br/>88C091CT</b>        | 60 Gy / 96%<br>60 [0-60]<br>2 MD     | 60 Gy / 98%<br>60 [0-60]                 | 30 fr / 96%<br>30 [0-30]<br>2 MD | 30 fr / 98%<br>30 [0-30]           | 40 d / 87%<br>40 [34-53]<br>3 MD | 19 d / 94%<br>19 [18-39]<br>1 MD |
| <b>CHART<br/>MRC</b>            | 60 Gy / 94%<br>60 [0-66]             | 54 Gy / 98%<br>54 [8.5-60.5]<br>1 MD     | 30 fr / 94%<br>30 [0-33]         | 36 fr / 97%<br>36 [1-36]<br>1 MD   | 40 d / 72%<br>43 [17-57]<br>2 MD | 12 d / 95%<br>12 [1-44]<br>2 MD  |
| <b>CHARTWEL</b>                 | 66 Gy / 95%<br>66 [0-72]             | 60 Gy / 95%<br>60 [0-66]                 | 33 fr / 95%<br>33 [0-58]         | 40 fr / 94%<br>40 [0-66]           | 45 d / 83%<br>45 [10-59]<br>1 MD | 18 d / 95%<br>18 [3-47]<br>2 MD  |
| <b>CHARTWEL<br/>CT</b>          | 66 Gy / 92%<br>66 [0-66]             | 60 Gy / 98%<br>60 [50-66]                | 33 fr / 92%<br>33 [0-33]         | 40 fr / 96%<br>40 [20-40]          | 45 d / 90%<br>45 [26-56]<br>1 MD | 18 d / 91%<br>18 [5-48]          |
| <b>ECOG 2597</b>                | 64 Gy / 91%<br>64 [0.6-68.4]<br>2 MD | 57.6 Gy / 98%<br>57.6 [5.8-57.7]<br>4 MD | -<br>-                           | -<br>-                             | -<br>-                           | -<br>-                           |

MD: Missing Data

\*Results: theoretical / % pts with >90% of theoretical  
observed median [range]

\*\*Results: theoretical / % pts with 90% to 110% of theoretical  
observed median [range]

**Web-Table 2: Observed compliance to treatment (total dose received, number of fractions and duration)**

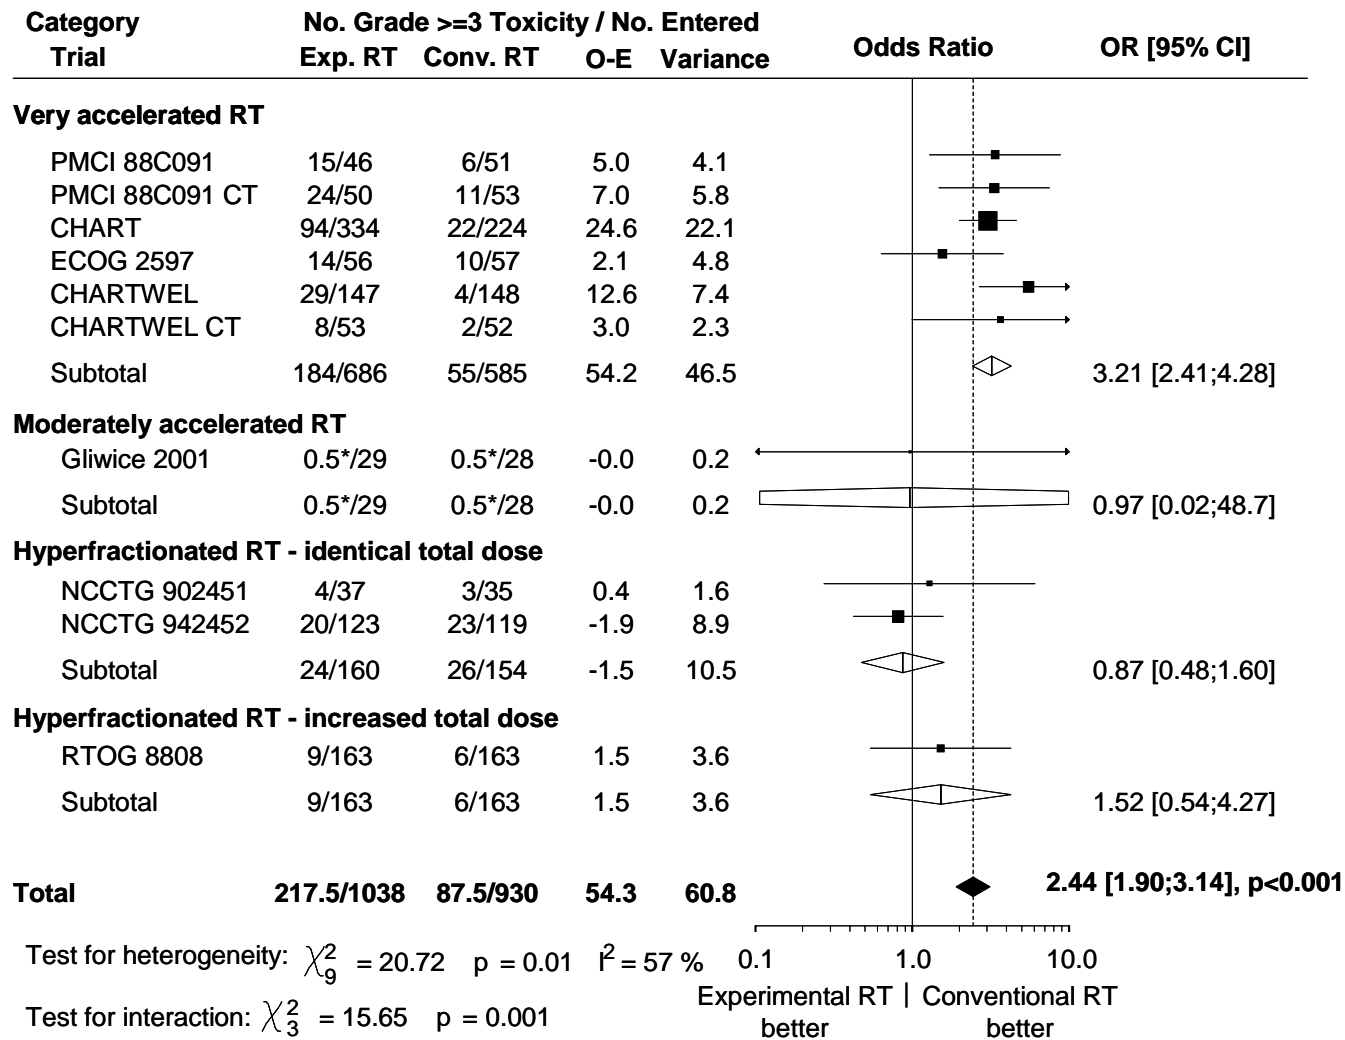

\*Arms without events were set to 0.5 for the purpose of analysis

**Web-Figure 5: Effect of modified radiotherapy versus conventional radiotherapy on acute esophageal toxicity, by radiotherapy subsets in non-small cell lung cancer trials.** See Web-Figure 1 for legend details.

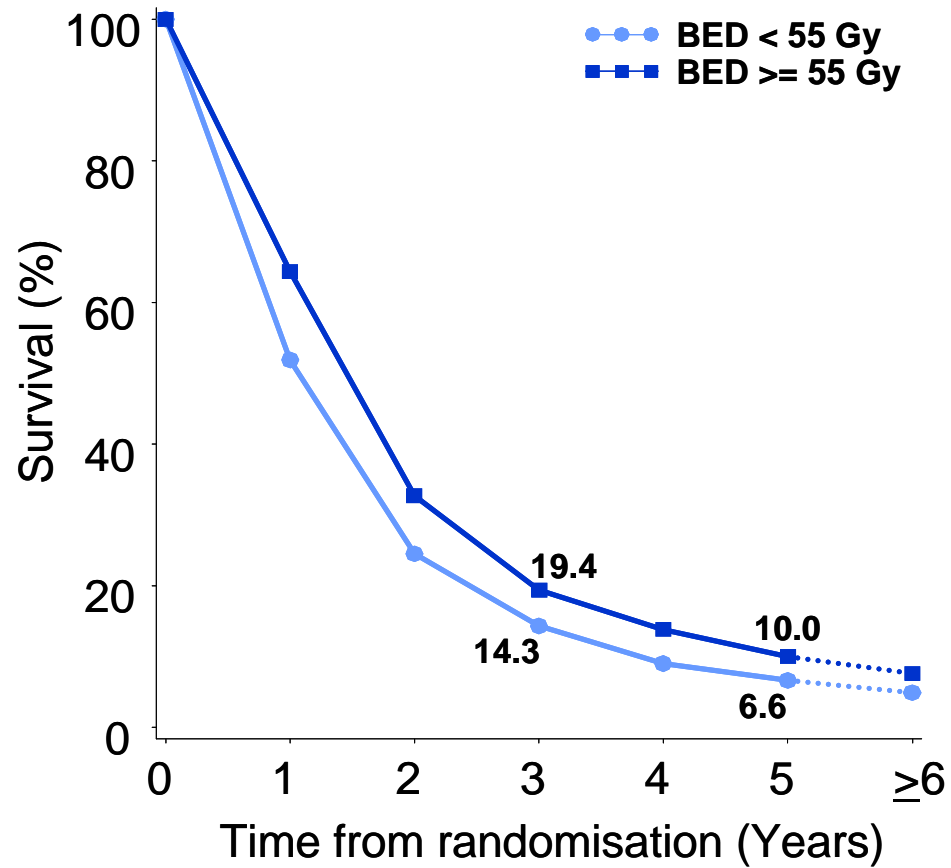

| Deaths/ person-years<br>by period | Year       |           |          |
|-----------------------------------|------------|-----------|----------|
|                                   | 0-2        | 3-5       | ≥6       |
| BED < 55 Gy                       | 314 / 408  | 58 / 114  | 11 / 41  |
| BED ≥ 55 Gy                       | 738 / 1349 | 211 / 484 | 40 / 135 |

**Web-Figure 6: Survival curves according to biological equivalent dose (BED) value.** A BED of 55.5 Gy corresponds to 60 Gy in 30 fractions over 40 days.

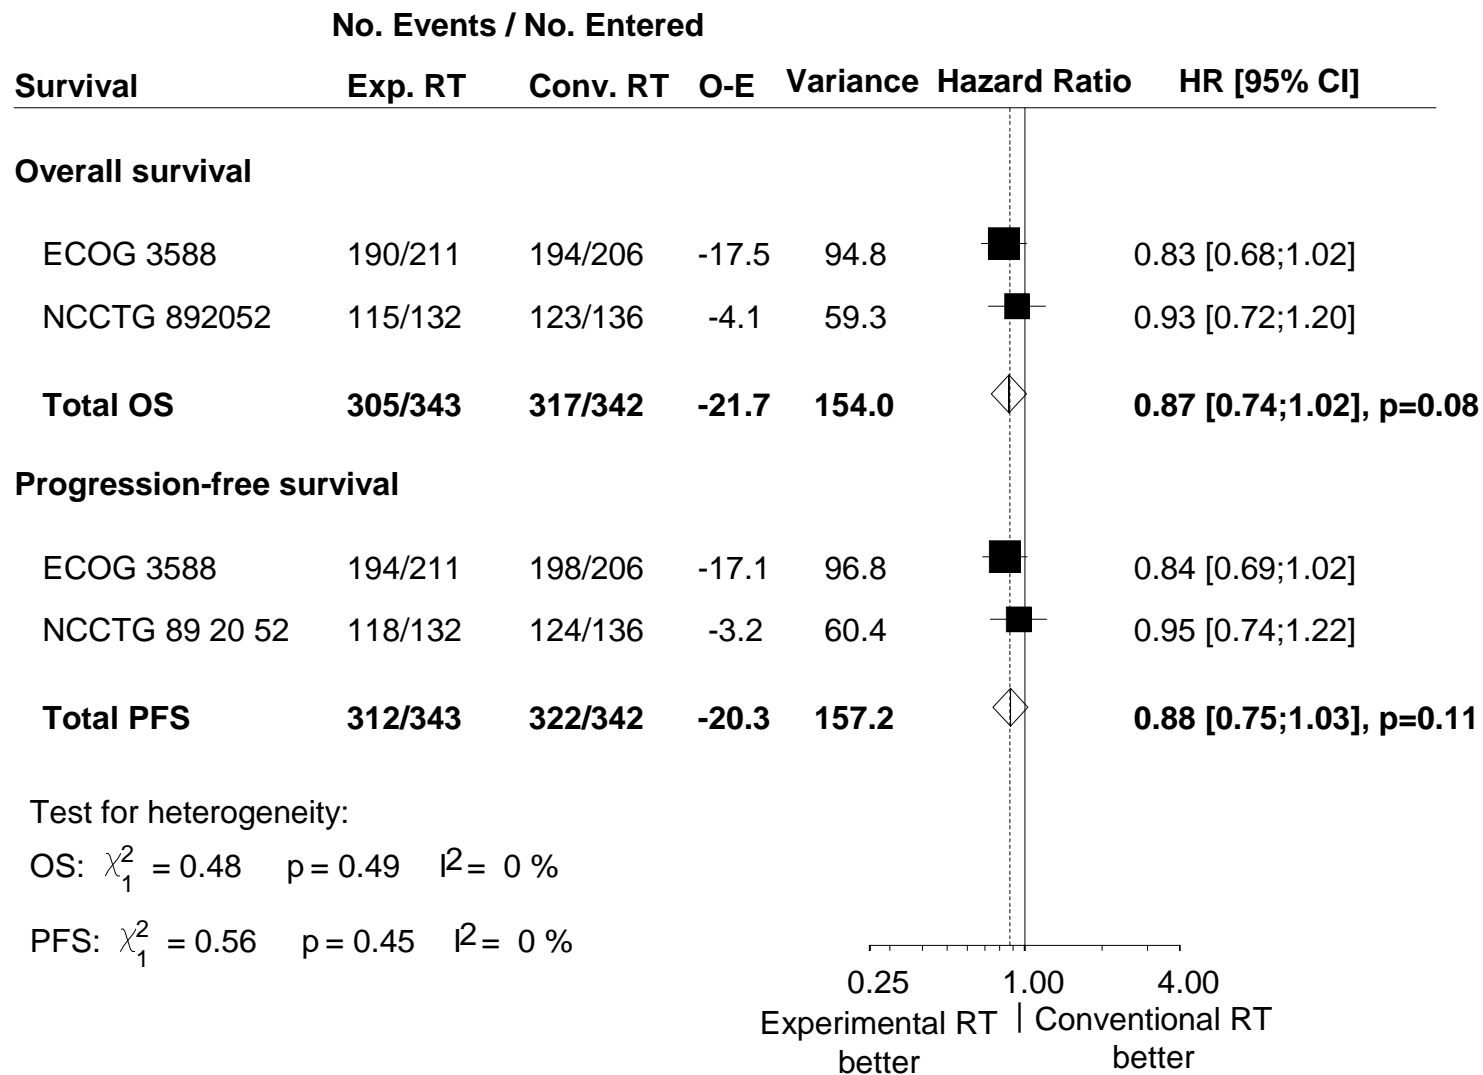

**Web-Figure 7: Effect of modified radiotherapy versus conventional radiotherapy on overall and progression-free survivals, by radiotherapy types in small cell lung cancer trials.** See web-Figure 1 for legend details.

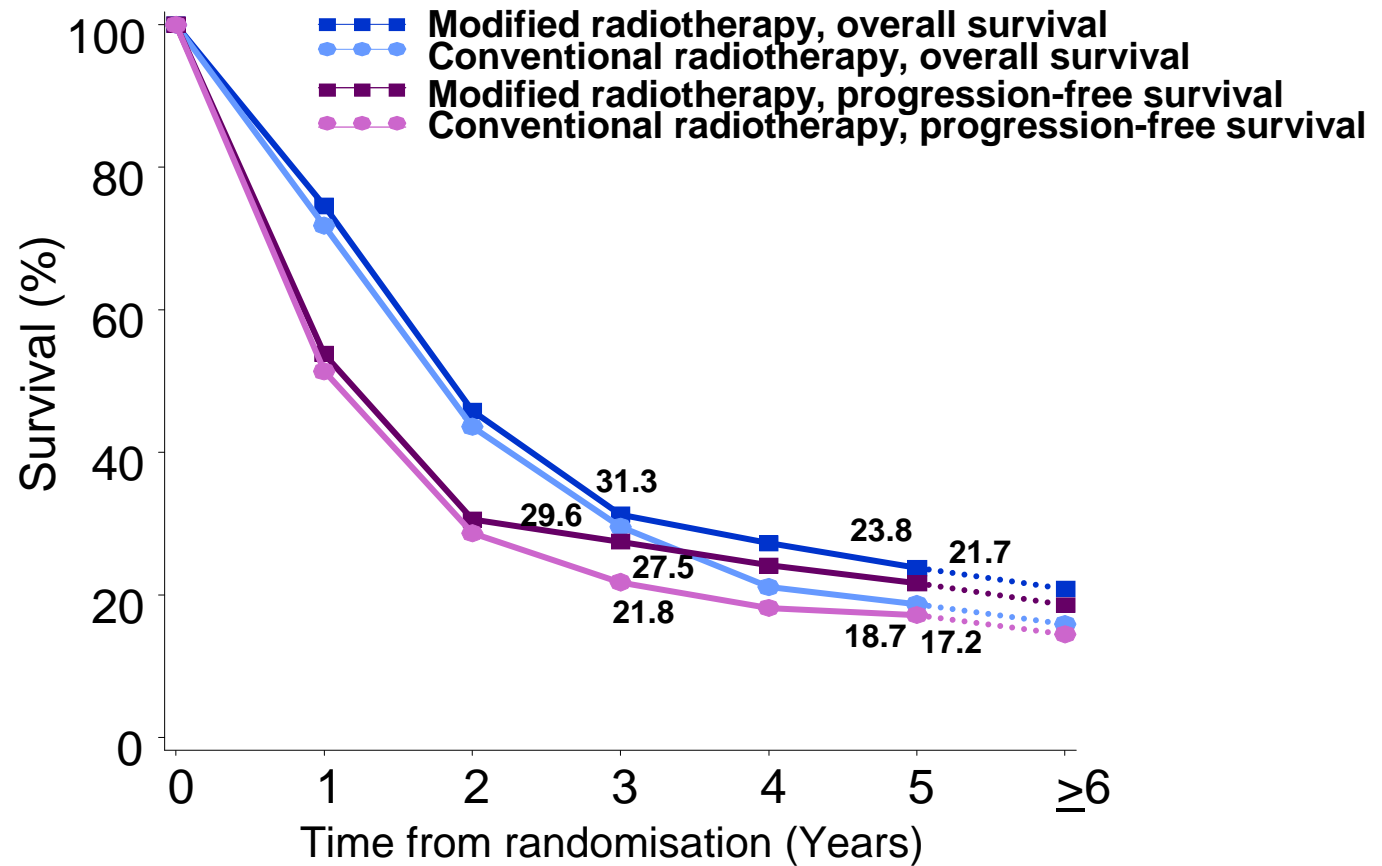

| Number of deaths/ person-years by period | Years 0-2   | Years 3-5 | Years ≥6 |
|------------------------------------------|-------------|-----------|----------|
|                                          | Modified RT | 185 / 504 | 73 / 317 |
| Conventional RT                          | 196 / 495   | 84 / 267  | 37 / 229 |
| Number of events/ person-years by period | Years 0-2   | Years 3-5 | Years ≥6 |
|                                          | Modified RT | 240 / 402 | 29 / 259 |
| Conventional RT                          | 249 / 387   | 38 / 200  | 35 / 200 |

**Web-Figure 8: Survival curves for the small cell lung cancer trials**

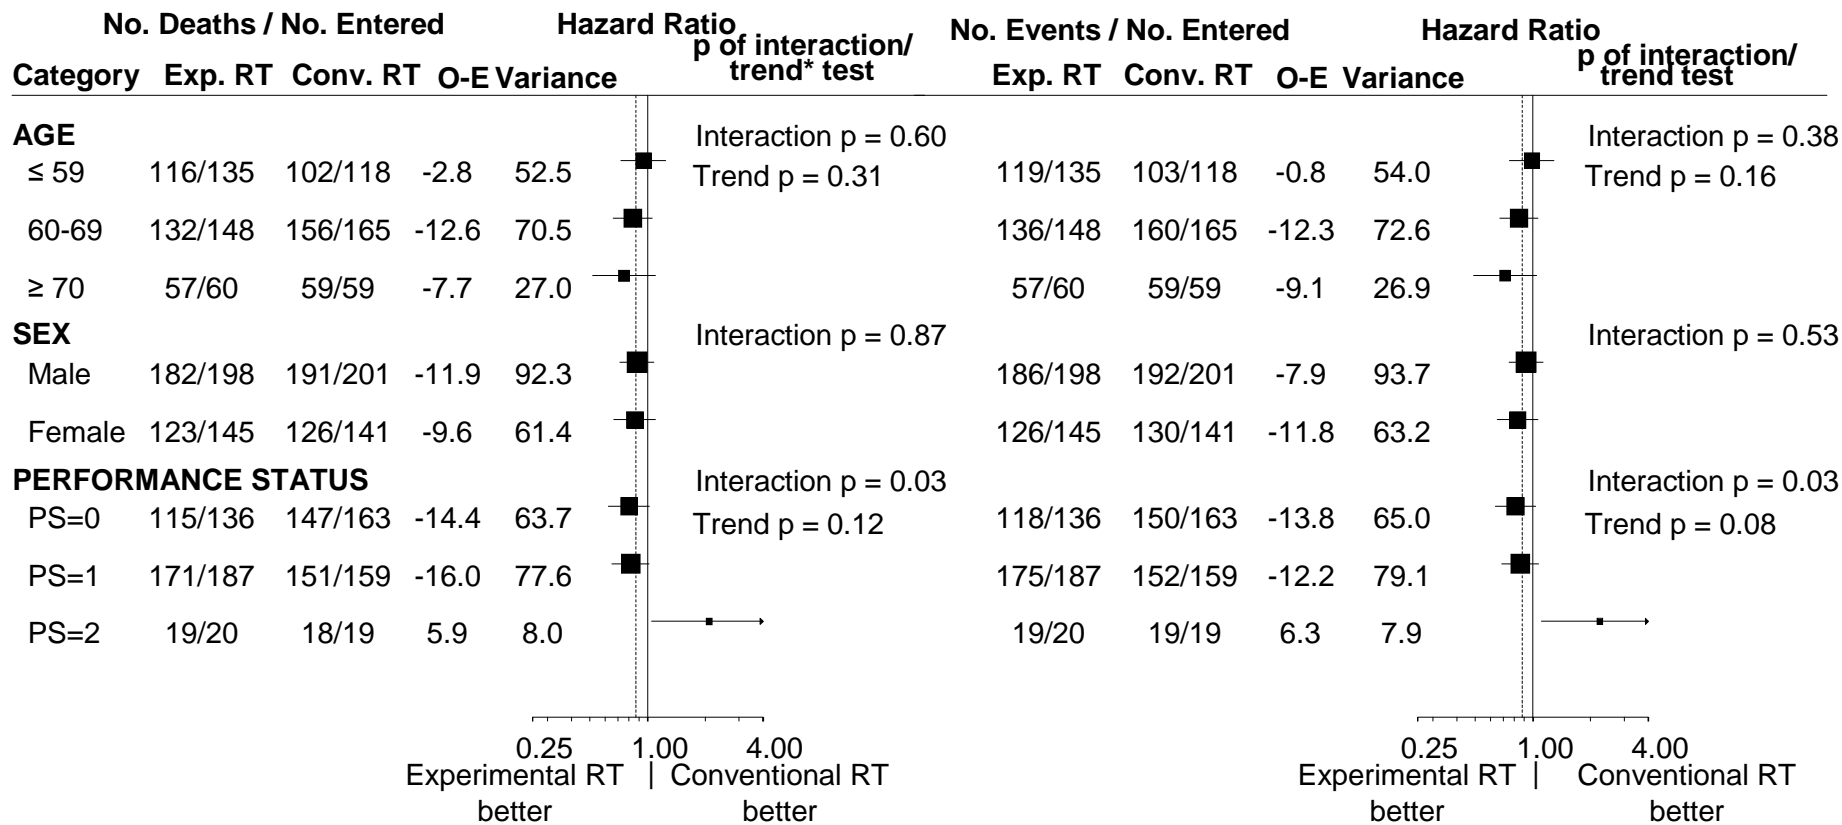

**Web-Figure 9: Effect of modified radiotherapy versus conventional radiotherapy on overall and progression-free survival, by patients characteristics in small cell lung cancer trials**
